# Supplementary material for: Healthcare professionals’ perceptions and experiences of physiotherapy for people with mental illness: a protocol for a systematic review and meta-ethnography
Source: HighWire-hosted journal article supplement (doi:10.1136/bmjopen-2022-061227), 2022-08-01
Supplement: bmjopen-2022-061227supp001_data_supplement.pdf [file bmjopen-2022-061227supp001_data_supplement.pdf]

| #  | Query                                                                                                                                                                                                 | Results from 20 Jun 2022 |
|----|-------------------------------------------------------------------------------------------------------------------------------------------------------------------------------------------------------|--------------------------|
| 1  | physiotherap*.mp. [mp=title, abstract, original title, name of substance word, subject heading word, protocol supplementary concept word, rare disease supplementary concept word, unique identifier] | 26,089                   |
| 2  | Physical Therapy Specialty/                                                                                                                                                                           | 2,957                    |
| 3  | Exercise Therapy/                                                                                                                                                                                     | 46,670                   |
| 4  | Allied Health Personnel/                                                                                                                                                                              | 12,711                   |
| 5  | "Attitude of Health Personnel"/                                                                                                                                                                       | 129,598                  |
| 6  | experience*.mp.                                                                                                                                                                                       | 1,083,040                |
| 7  | perception*.mp.                                                                                                                                                                                       | 448,724                  |
| 8  | perspective*.mp.                                                                                                                                                                                      | 321,326                  |
| 9  | confidence.mp.                                                                                                                                                                                        | 551,316                  |
| 10 | Qualitative Research/                                                                                                                                                                                 | 74,539                   |
| 11 | narrative.mp.                                                                                                                                                                                         | 45,127                   |
| 12 | grounded theory/                                                                                                                                                                                      | 2,446                    |
| 13 | ethnography.mp.                                                                                                                                                                                       | 3,385                    |
| 14 | phenomenology.mp.                                                                                                                                                                                     | 8,399                    |
| 15 | thematic analysis.mp.                                                                                                                                                                                 | 24,611                   |
| 16 | Health Knowledge, Attitudes, Practice/                                                                                                                                                                | 123,669                  |
| 17 | Mental Health/                                                                                                                                                                                        | 53,586                   |
| 18 | Mental Disorders/                                                                                                                                                                                     | 173,654                  |
| 19 | psychiatric illness.mp.                                                                                                                                                                               | 6,482                    |
| 20 | Anxiety/                                                                                                                                                                                              | 98,679                   |
| 21 | Depression/                                                                                                                                                                                           | 141,467                  |
| 22 | Schizophrenia/                                                                                                                                                                                        | 108,195                  |
| 23 | Bipolar Disorder/                                                                                                                                                                                     | 43,800                   |
| 24 | Psychological Distress/                                                                                                                                                                               | 3,310                    |
| 25 | Dementia/                                                                                                                                                                                             | 58,346                   |
| 26 | Mood Disorders/                                                                                                                                                                                       | 15,530                   |
| 27 | Psychotic Disorders/                                                                                                                                                                                  | 50,405                   |
| 28 | Physical Therapists/                                                                                                                                                                                  | 2,737                    |
| 29 | Physical Therapy Modalities/                                                                                                                                                                          | 39,584                   |
| 30 | physical therap*.mp.                                                                                                                                                                                  | 56,540                   |
| 31 | Attitude/                                                                                                                                                                                             | 51,826                   |
| 32 | qualitative.mp.                                                                                                                                                                                       | 256,930                  |
| 33 | theme.mp.                                                                                                                                                                                             | 23,212                   |
| 34 | mental health.mp.                                                                                                                                                                                     | 205,950                  |
| 35 | mental illness.mp.                                                                                                                                                                                    | 29,049                   |

|    |                                                                            |           |
|----|----------------------------------------------------------------------------|-----------|
| 36 | 1 or 2 or 3 or 4 or 28 or 29 or 30                                         | 123,528   |
| 37 | 10 or 11 or 12 or 13 or 14 or 15 or 32 or 33                               | 327,920   |
| 38 | 5 or 6 or 7 or 8 or 9 or 16 or 31                                          | 2,412,538 |
| 39 | 17 or 18 or 19 or 20 or 21 or 22 or 23 or 24 or 25 or 26 or 27 or 34 or 35 | 720,685   |
| 40 | 36 and 37 and 38 and 39                                                    | 212       |

Final search terms across four facets:

Physiotherap\*.mp. OR Physical Therapy Specialty/ OR Exercise Therapy/ OR Allied Health Personnel/ Physical Therapists/ OR Physical Therapy Modalities/ OR physical therap\*.mp.

AND

"Attitude of Health Personnel"/ OR experience\*.mp. OR perception\*.mp. OR perspective\*.mp. OR confidence.mp. OR Attitude/ OR Health Knowledge, Attitudes, Practice/

AND

Qualitative Research/ OR narrative.mp. OR grounded theory/ OR ethnography.mp. OR phenomenology.mp. OR thematic analysis.mp. OR qualitative.mp. OR theme.mp.

AND

Mental Health/ OR Mental Disorders/ OR psychiatric illness.mp. OR Anxiety/ OR Depression/ OR Schizophrenia/ OR Bipolar Disorder/ OR Psychological Distress/ OR Dementia/ OR Mood Disorders/ OR Psychotic Disorders/ OR mental health.mp. OR mental illness.mp.
