# Supplementary material for: Healthcare professionals’ perceptions and experiences of physiotherapy for people with mental illness: a protocol for a systematic review and meta-ethnography
Source: HighWire-hosted journal article supplement (doi:10.1136/bmjopen-2022-061227), 2022-08-01
Supplement: bmjopen-2022-061227supp002_data_supplement.pdf [file bmjopen-2022-061227supp002_data_supplement.pdf]

**Appendix 2: Search database strategies for all databases to be used****Pubmed:** 1,780

Limiters: none

(((((("Depression"[Mesh]) OR "Anxiety"[Mesh]) OR "Psychotic Disorders"[Mesh]) OR "Bipolar Disorder"[Mesh]) OR "Mental Disorders"[Mesh]) OR "Mental Health"[Mesh]) OR "Psychological Distress"[Mesh]) OR "Schizophrenia Spectrum and Other Psychotic Disorders"[Mesh]) OR "Dementia"[Mesh]) OR "Mental Disorders") OR "Schizophren\*")

AND

((((Physiotherap\* OR physical therap\* OR "Allied health personnel"[Mesh] OR "physical therapy modalities"[Mesh] OR "physical health speciality" OR "exercise therapy")

AND

(((((("Attitude\*") OR "Perception\*") OR "Experience\*") OR "Perspective\*") OR "Confidence") OR "Attitude of health personnel"[Mesh])

AND

((((((("Qualitative") OR "narrative") OR "grounded theory") OR "phenomenology") OR "ethnography") OR "thematic analysis") OR theme)

**CINAHL Plus:**

Limiters: none

Expanders - Apply equivalent subjects

Search modes - Boolean/Phrase

(MH "Mental Disorders/ED/PF/RH/TH") OR ( ((((((("Depression"/) OR "Anxiety"/) OR "Psychotic Disorders"/) OR "Bipolar Disorder"/) OR "Mental Disorders"/) OR "Mental Health"/) OR "Psychological Distress"/) OR "Schizophrenia Spectrum and Other Psychotic Disorders"/) OR "Dementia"/) OR "Mental Disorders") OR "Schizophren\*") )

AND ( Physiotherap\* OR physical therap\* OR "Allied health professional" OR "allied health personnel" "physical therapy modalities/ OR "exercise therapy")

AND ( "Attitude\*" OR "Perception\*" OR "Experience\*" OR "Perspective\*" OR "Confidence" OR "Attitude of health personnel"/ )

AND ( "Qualitative" OR "narrative" OR "grounded theory" OR "phenomenology" OR "ethnography" OR "thematic analysis" OR themes )"

**Medline:**

Limiters: none

(physiotherap\*.mp. OR Physical Therapy Specialty/ OR Exercise Therapy/ OR Allied Health Personnel/ Physical Therapists/ OR Physical Therapy Modalities/ OR physical therap\*.mp.

AND

"Attitude of Health Personnel"/ OR experience\*.mp. OR perception\*.mp. OR perspective\*.mp. OR confidence.mp. OR Attitude/ OR Health Knowledge, Attitudes, Practice/

AND

Qualitative Research/ OR narrative.mp. OR grounded theory/ OR ethnography.mp. OR phenomenology.mp. OR thematic analysis.mp. OR qualitative.mp. OR theme.mp.

AND

Mental Health/ OR Mental Disorders/ OR psychiatric illness.mp. OR Anxiety/ OR Depression/ OR Schizophrenia/ OR Bipolar Disorder/ OR Psychological Distress/ OR Dementia/ OR Mood Disorders/ OR Psychotic Disorders/ OR mental health.mp. OR mental illness.mp.).af

**Psychinfo:**

Limiters: none

(physiotherap\*.mp. OR Physical Therapy Specialty/ OR Exercise Therapy/ OR Allied Health Personnel/ Physical Therapists/ OR Physical Therapy Modalities/ OR physical therap\*.mp.

AND

"Attitude of Health Personnel"/ OR experience\*.mp. OR perception\*.mp. OR perspective\*.mp. OR confidence.mp. OR Attitude/ OR Health Knowledge, Attitudes, Practice/

AND

Qualitative Research/ OR narrative.mp. OR grounded theory/ OR ethnography.mp. OR phenomenology.mp. OR thematic analysis.mp. OR qualitative.mp. OR theme.mp.

AND

Mental Health/ OR Mental Disorders/ OR psychiatric illness.mp. OR Anxiety/ OR Depression/ OR Schizophrenia/ OR Bipolar Disorder/ OR Psychological Distress/ OR Dementia/ OR Mood Disorders/ OR Psychotic Disorders/ OR mental health.mp. OR mental illness.mp.).

**Embase:**

((physiotherap\* mp or Physical Therapy Specialty or Exercise Therapy or Allied Health Personnel or Physical Therapists or Physical Therapy Modalities or physical therap\*) and ("Attitude of Health Personnel" or experience\* or perception\* or perspective\* or confidence or Attitude or Health Knowledge, Attitudes, Practice) and (Qualitative Research or narrative or grounded theory or ethnography or phenomenology or thematic analysis or qualitative or theme) and (Mental Health or Mental Disorders or psychiatric illness or Anxiety or Depression or Schizophrenia or Bipolar Disorder or Psychological Distress or Dementia or Mood Disorders or Psychotic Disorders or mental health or mental illness)).af.

**Google scholar:**

(physiotherapy\* OR physical therap\*) AND experience OR perception OR confidence OR Attitude AND (Qualitative Research) AND (Mental Health OR Mental Disorders)

**Science direct:**

(physiotherapy OR physical therapy) AND experience OR perception OR confidence OR Attitude AND (Qualitative Research) AND (Mental Health OR Mental Disorders)

**PROQuest:**

noft(physiotherap\* OR Physical Therapy Specialty OR Exercise Therapy OR Allied Health Personnel OR Physical Therapists OR Physical Therapy Modalities OR physical therap\*) AND noft(experience\* OR perception\* OR perspective\* OR confidence OR Attitude OR Health Knowledge, Attitudes, Practice) AND noft(Qualitative Research OR narrative OR grounded theory OR ethnography OR phenomenology OR thematic analysis OR qualitative or theme) AND noft(Mental Disorders OR psychiatric illness OR Anxiety OR Depression OR Schizophrenia OR Bipolar Disorder OR Psychological Distress OR Dementia OR Mood Disorders OR Psychotic Disorders OR mental health OR mental illness)
